1 **Circulating SARS-CoV-2 variants B.1.1.7, 501Y.V2, and P.1 have gained ability**  
2 **to utilize rat and mouse Ace2 and altered in vitro sensitivity to neutralizing**  
3 **antibodies and ACE2-Ig**

4 Weitong Yao<sup>1,2</sup>, Yifei Wang<sup>1</sup>, Danting Ma<sup>1</sup>, Xiaojuan Tang<sup>1,2</sup>, Haimin Wang<sup>1</sup>, Chao Li<sup>1</sup>, Hua  
5 Lin<sup>3</sup>, Yujun Li<sup>1\*</sup>, Guocai Zhong<sup>1,2\*</sup>

6 **Affiliations:**

7 <sup>1</sup> Shenzhen Bay Laboratory, Shenzhen 518132, China

8 <sup>2</sup> School of Chemical Biology and Biotechnology, Peking University Shenzhen Graduate  
9 School, Shenzhen 518055, China

10 <sup>3</sup> Biomedical Research Center of South China, Fujian Normal University, Fuzhou 350117,  
11 China

12 \* Corresponding author. Email: [liyj@szbl.ac.cn](mailto:liyj@szbl.ac.cn); [zhonggc@szbl.ac.cn](mailto:zhonggc@szbl.ac.cn)

13 **Running title:** Receptor usage and neutralization sensitivity of SARS-CoV-2 variants

14 **Keywords:** SARS-CoV-2; Spike mutation; mouse Ace2; rat Ace2; ACE2-Ig; neutralizing  
15 antibody

16

17 **Abstract**

18 Spontaneous and selection-pressure-driven evolution of SARS-CoV-2 has started to pose more  
19 challenges to controlling the pandemic. Here, we first investigated cross-species receptor  
20 usage of multiple SARS-CoV-2 variants that emerged during the pandemic. We found that, in  
21 contrast to an early isolate WHU01, the circulating variants B.1.1.7/501Y.V1,  
22 B.1.351/501Y.V2, and P.1/501Y.V3 were able to use rat and mouse Ace2 orthologs as entry  
23 receptors, suggesting that rats and mice might be able to harbor and spread these variants. We  
24 then evaluated in vitro sensitivity of these variants to three therapeutic antibodies in clinics  
25 (etesevimab/LY-CoV016, casirivimab/REGN10933, and imdevimab/REGN10987) and an  
26 ACE2-Ig variant we developed recently. We found that all the tested SARS-CoV-2 variants  
27 showed reduced sensitivity to at least one of the tested antibodies but slightly increased  
28 sensitivity to the ACE2-Ig protein. These data demonstrate that the ACE2-Ig is a good drug  
29 candidate against SARS-CoV-2 variants that emerge over the course of the pandemic.

## 30 **Introduction**

31 The severe acute respiratory syndrome coronavirus 2 (SARS-CoV-2), the etiological agent of  
32 the ongoing coronavirus disease 2019 (COVID-19) pandemic, has already caused about 100  
33 million confirmed infections and over 2 million documented deaths across 224 countries,  
34 according to World Health Organization's online updates  
35 (<https://www.who.int/emergencies/diseases/novel-coronavirus-2019>). The pandemic has  
36 triggered unprecedentedly extensive worldwide efforts to develop countermeasures against  
37 COVID-19, and a number of encouraging progresses have been achieved in developing  
38 prophylactic vaccines and antibody therapeutics<sup>1-9</sup>. So far, there are at least six prophylactic  
39 COVID-19 vaccines that have been approved by different countries for clinical use. These  
40 include two mRNA vaccines (Pfizer-BioNTech, US; Moderna, US)<sup>1,2</sup>, two inactivated vaccines  
41 (Sinopharm, China; Sinovac, China)<sup>3-5</sup>, and two adenoviral vectored vaccines (Sputnik V,  
42 Russia; AstraZeneca-Oxford, UK)<sup>6,7</sup>. There are also some convalescent patient-derived  
43 antibodies that have been approved for clinical use, such as Regeneron's antibody cocktail  
44 consisting of casirivimab (REGN10933) and imdevimab (REGN10987)<sup>8</sup>.

45 SARS-CoV-2 is a betacoronavirus that has broad host ranges<sup>10-13</sup>. We recently found that  
46 SARS-CoV-2 can use human ACE2 and a wide range of animal-Ace2 orthologs, but not rat or  
47 mouse Ace2, for cell entry<sup>11</sup>. However, a single amino-acid change within the Spike receptor-  
48 binding domain (RBD; Q498H, Q498Y, or N501Y) could be sufficient to confer SARS-CoV-  
49 2 the ability to utilize mouse Ace2<sup>ref.14-17</sup>. SARS-CoV-2 is a single-stranded RNA virus with  
50 moderate mutation and recombination frequencies<sup>18,19</sup>. Spontaneous and selection-pressure-  
51 driven mutations, especially those within the Spike RBD region, might alter cross-species  
52 receptor usage by SARS-CoV-2, or compromise the efficacy of neutralizing antibodies and  
53 vaccines based on the Spike sequence of early SARS-CoV-2 strains, posing additional  
54 challenges to controlling the pandemic. Therefore, in this study, we investigated cross-species

55 receptor usage, as well as neutralization sensitivity, of multiple SARS-CoV-2 variants that  
56 emerged during the pandemic.

## 57 **Results**

58 Spike RBD is the major determinant of viral receptor usage and neutralization sensitivity, we  
59 thus primarily focused on RBD mutations found in different variants, especially the Variants  
60 of Concern (VOC) that emerged from the UK (VOC202012/01, also known as B.1.1.7 or  
61 501Y.V1), South Africa (VOC202012/02, also known as 501Y.V2 or B.1.351), and Brazil  
62 (VOC202101/02, also known as P.1 or 501Y.V3), respectively. These include an N439K  
63 mutation from the circulating variant B.1.141<sup>ref.20</sup>, an N501Y mutation from B.1.1.7/501Y.V1  
64 <sup>21,22</sup>, E484K and N501Y mutations from B.1.351/501Y.V2<sup>23</sup> and P.1/501Y.V3 <sup>24</sup>, and a Y453F  
65 mutation from two mink-associated variants that emerged in Netherlands and Denmark mink  
66 farms<sup>25-27</sup> (Figure 1). We further included a Spike Y453F-Q498H double mutant that has not  
67 been detected in patient samples yet, but could evolve from the early isolate WHU01 through  
68 adopting only two nucleotide mutations, or from the mink-associated Y453F variant through  
69 adopting a single nucleotide mutation. To evaluate Spike protein-mediated viral entry of the  
70 above-mentioned variants, we constructed Spike expression plasmids for these variants and  
71 produced luciferase reporter retroviruses pseudotyped with one of these different Spike variants.  
72 As rats and mice are rodent species that have huge population size and could have close  
73 contacts with human and domestic animal populations, it's important to monitor SARS-CoV-  
74 2's ability to utilize rat and mouse Ace2 as receptor. We therefore used the Spike variant-  
75 pseudotyped reporter viruses to infect 293T cells transfected with an expression plasmid of  
76 human, rat, or mouse ACE2 ortholog. Parallel infection experiments using 293T cells  
77 transfected with an empty vector plasmid were included as controls. Consistent with our  
78 previous report, the early strain WHU01 only infected 293T cells expressing human ACE2, but

79 not rat or mouse Ace2 (Figure 2A). Though the variant carrying  $\Delta(69-70)$ -N439K mutations  
80 and the mink-associated variant carrying  $\Delta(69-70)$ -Y453F mutations did so too (Figures 2B  
81 and C), the mink-associated variant that carries  $\Delta(69-70)$ -Y453F-F486L-N501T-M1229I  
82 mutations also infected 293T cells expressing mouse Ace2, albeit with much lower efficiency  
83 than infecting cells expressing human ACE2 (Figure 2D). It is of note that, in addition to the  
84 Y453F-Q498H variant, all the variants that carry an N501Y mutation efficiently utilized all the  
85 three Ace2 orthologs (Figures 2E-H). The variant that carries K417N-E484K-N501Y  
86 mutations utilized rat Ace2 even more efficiently than using human ACE2 (Figure 2G). These  
87 data suggest that the circulating SARS-CoV-2 variants B.1.1.7/501Y.V1, B.1.351/501Y.V2,  
88 and P.1/501Y.V3 may be able to efficiently infect mice and rats, adding one more concerning  
89 factor to these VOC strains.

90 We then performed neutralization assays to evaluate sensitivity of these SARS-CoV-2 variants  
91 to three therapeutic antibodies in clinics (etesevimab/LY-CoV016, casirivimab/REGN10933,  
92 and imdevimab/REGN10987)<sup>8,9</sup> and an ACE2-Ig variant we developed recently<sup>11</sup>. When  
93 tested against the early strain WHU01, the Regeneron antibody casirivimab neutralized the  
94 virus with the best potency, about 3-fold more potent than our ACE2-Ig, and about 20-fold  
95 more potent than the monoclonal antibody etesevimab (Figure 3A and Table 1). When tested  
96 against the variants, all the antibodies in general showed decreased sensitivity to at least one  
97 variant (Figures 3B-H). Specifically, variants carrying an N501Y or N501T mutation were  
98 found to be highly resistant to etesevimab (Figures 3D-G). Variants carrying a Y453F mutation  
99 were found to be highly resistant to casirivimab (Figures 3C and D). It is of note that the  $\Delta(69-$   
100  $70)$ -Y453F-F486L-N501T-M1229I mutations carried by mink-associated variants and the  
101 K417N-E484K-N501Y mutations carried by the South Africa VOC strain B.1.351/501Y.V2  
102 made the virus highly resistant to both etesevimab and casirivimab, adding another concerning  
103 factor to these two variants (Figures 3D and G). In addition, the Spike Y453F-Q498H double

104 mutation made the virus partially resistant to etesevimab and highly resistant to both of the  
105 Regeneron antibodies, casirivimab and imdevimab (Figure 3H). Consistent with these  
106 neutralization data, structural data analysis revealed contact of etesevimab with RBD residues  
107 K417 and N501, casirivimab with RBD residues Y453, E484, and F486, and imdevimab with  
108 RBD residues N439 and Q498 (Figures 3I-K). On the other hand, when tested against the  
109 variants, ACE2-Ig protein did not lose efficacy at all. Rather, it seems that ACE2-Ig gains  
110 potency along with the course of the pandemic, consistent with the neutralizing mechanism of  
111 this protein (Figures 3A-G and Table 1).

## 112 **Discussion**

113 The Spike protein is the major host-range determinant and neutralizing antigen of SARS-CoV-  
114 2. It has been undergoing a number of mutations since the outbreak of the COVID-19 epidemic  
115 in the end of 2019<sup>ref.10,20-25,27-29</sup>. With more and more SARS-CoV-2 variants being identified  
116 to carry diverse Spike mutations within the RBD region, especially the Variants of Concern  
117 initially identified in the UK (B.1.1.7 lineage)<sup>21,22</sup>, South Africa (501Y.V2 lineage)<sup>23</sup>, and  
118 Brazil (P.1 lineage)<sup>24</sup>, it is critical to understand whether the host range and neutralization  
119 sensitivity of these variants have changed. In this study, we first investigated cross-species  
120 receptor usage of an early SARS-CoV-2 isolate and multiple SARS-CoV-2 variants that  
121 emerged during the pandemic (Figure 2). A mink-associated variant that carries  $\Delta(69-70)$ -  
122 Y453F-F486L-N501T-M1229I mutations was found also able to utilize mouse Ace2. In  
123 addition, all the variants that carry an N501Y mutation, a shared feature of the UK, South  
124 Africa, and Brazil VOC strains, were found able to efficiently use rat and mouse Ace2  
125 orthologs for entry (Figures 2E-G), consistent with the identification of N501Y as the mouse-  
126 susceptibility determinant of a mouse-adapted SARS-CoV-2 strain<sup>16</sup>. Moreover, the K417N-  
127 E484K-N501Y mutations found in the South Africa variant 501Y.V2 even enable the virus to

128 utilize rat Ace2 more efficiently than using human ACE2. These data suggest that rats and  
129 mice may be able to harbor and spread these variants. Rats and mice are vaccine-inaccessible  
130 rodent species that have large population size and could have close contacts with both human  
131 and domestic animal populations. It is possible that the N501Y-associated circulating variants  
132 might have emerged as an adaptation to rats before being passed back to humans. It is therefore  
133 critical to closely monitor cross-species transmission and evolution of these SARS-CoV-2  
134 variants.

135 We also evaluated sensitivity of these variants to three therapeutic antibodies in clinics  
136 (etesevimab/LY-CoV016, casirivimab/REGN10933, and imdevimab/REGN10987) and an  
137 ACE2-Ig variant we developed recently (Figure 3 and Table 1). We found that all the tested  
138 Spike mutations were able to confer resistance to at least one of the three tested antibodies. A  
139 mink-associated strain and the South Africa VOC strain 501Y.V2 are highly resistant to both  
140 etesevimab and casirivimab. The South Africa VOC strain 501Y.V2 and the Brazil VOC strain  
141 P.1/501Y.V3 are identical within the RBD region except that 501Y.V2 RBD adopted a K417N  
142 mutation and P.1/501Y.V3 RBD adopted a K417T mutation, it's therefore likely that the Brazil  
143 VOC strain P.1/501Y.V3 is also highly resistant to both etesevimab and casirivimab. More  
144 importantly, two simple amino-acid mutations in the Spike, Y453F-Q498H, made the virus  
145 partially resistant to etesevimab and highly resistant to both casirivimab and imdevimab, the  
146 two monoclonal antibodies constituting Regeneron's FDA-approved antibody cocktail. The  
147 Y453F-Q498H double mutant has not been detected in patient samples yet. However, it could  
148 easily evolve from the early isolate WHU01 through adopting only two nucleotide mutations,  
149 or evolve from mink-associated Y453F variant or mouse-adapted Q498H variant through  
150 adopting a single nucleotide mutation. Potential cross-species transmission of SARS-CoV-2  
151 variants, such as the South Africa VOC strain 501Y.V2, from humans to rats or mice, to  
152 domestic animals, and then back to humans, might accelerate the emergence of new variants.

153 Immune pressures, such as clinical applications of non-broadly neutralizing antibodies or  
154 vaccines, or patients' immune reactions to SARS-CoV-2 infections, are also prone to drive  
155 more and more immune-evasion mutations. These mutation-driving factors altogether will  
156 likely accelerate the loss of efficacy of the therapeutic antibodies and possibly the vaccines in  
157 clinics, posing additional challenges to the ongoing devastating pandemic. Indeed, during  
158 preparation of this manuscript, multiple preprint reports have shown that the 501Y.V2 variant  
159 significantly reduced the potency of vaccine-induced neutralization antibodies<sup>30-32</sup>. It is  
160 therefore urgent to develop broadly anti-SARS-CoV-2 therapeutics or vaccines.

161 Soluble ACE2 protein, which neutralizes SARS-CoV-2 infection through competitive blocking  
162 the interaction between viral Spike protein and cell-surface receptor ACE2, represents a good  
163 candidate that will be hardly escaped by SARS-CoV-2 variants. It could also be a good  
164 alternative anti-SARS-CoV-2 agent to the populations who are reluctant to take, not responsive  
165 to, or don't have access to any prophylactic vaccines. Recently we have developed a panel of  
166 ACE2-Ig variants that potently neutralize SARS-CoV-2 early isolate at picomolar range, and  
167 have demonstrated that the protein is broadly effective against four distinct coronaviruses,  
168 suggesting that the protein could be used to protect from SARS-CoV-2 and some other SARS-  
169 CoV-2-like viruses that might spillover into humans in the future<sup>11</sup>. In this study, we  
170 demonstrated that the ACE2-Ig protein is broadly effective against all the tested SARS-CoV-2  
171 variants, including the ones simultaneously resistant to two or three neutralizing antibodies.  
172 Perhaps more importantly, it seems that SARS-CoV-2 evolution tend to reduce sensitivity to  
173 neutralizing antibodies while increasing sensitivity to ACE2-Ig (Figure 3 and Table 1). These  
174 data suggest that ACE2 is still likely an essential receptor for SARS-CoV-2, and that ACE2-Ig  
175 could be used to treat and prevent infection of any SARS-CoV-2 variant that emerges over the  
176 course of the pandemic. Animal studies to test and optimize pharmacokinetics, as well as *in*  
177 *vivo* anti-SARS-CoV-2 efficacy, of the ACE2-Ig protein are ongoing.



## 178 **Methods**

179 Methods and associated references are provided below.

## 180 **Acknowledgements**

181 We thank Dr. Yu J. Cao (School of Chemical Biology and Biotechnology, Peking University  
182 Shenzhen Graduate School, Shenzhen, China) for generously providing the 293F cells used in  
183 this study for the production of ACE2-Ig protein and SARS-CoV-2 antibodies. We thank Dr.  
184 Michael D. Alpert (Emmune, Inc., USA) for sharing useful comments on this manuscript.

185 This work was supported by Guangdong Provincial Department of Science & Technology  
186 COVID-19 Contingency Funds (2020B1111340063, G.Z.), Shenzhen Bay Laboratory Startup  
187 Funds (21230041, G.Z.), and Major Program of Shenzhen Bay Laboratory (S201101001-2,  
188 G.Z.).

## 189 **Contributions**

190 G.Z. conceived and designed this study. W.Y., Y.W., D.M., X.T., H.W., and Y.L. generated  
191 all experimental materials. W.Y. and Y.L. performed all experiments, acquired and analyzed  
192 all data. C.L. and H.L. contributed key resources. G.Z. wrote the manuscript.

## 193 **Competing interests**

194 Shenzhen Bay Laboratory has filed a PCT patent application for ACE2-Ig variants.

## 195 **References**

196 1 Polack, F. P. *et al.* Safety and Efficacy of the BNT162b2 mRNA Covid-19 Vaccine. *N*  
197 *Engl J Med* **383**, 2603-2615, (2020).

- 198 2 Baden, L. R. *et al.* Efficacy and Safety of the mRNA-1273 SARS-CoV-2 Vaccine. *N*  
199 *Engl J Med*, (2020).
- 200 3 Wang, H. *et al.* Development of an Inactivated Vaccine Candidate, BBIBP-CorV, with  
201 Potent Protection against SARS-CoV-2. *Cell* **182**, 713-721 e719, (2020).
- 202 4 Xia, S. *et al.* Safety and immunogenicity of an inactivated SARS-CoV-2 vaccine,  
203 BBIBP-CorV: a randomised, double-blind, placebo-controlled, phase 1/2 trial. *Lancet*  
204 *Infect Dis* **21**, 39-51, (2021).
- 205 5 Gao, Q. *et al.* Development of an inactivated vaccine candidate for SARS-CoV-2.  
206 *Science* **369**, 77-81, (2020).
- 207 6 Logunov, D. Y. *et al.* Safety and immunogenicity of an rAd26 and rAd5 vector-based  
208 heterologous prime-boost COVID-19 vaccine in two formulations: two open, non-  
209 randomised phase 1/2 studies from Russia. *Lancet* **396**, 887-897, (2020).
- 210 7 Voysey, M. *et al.* Safety and efficacy of the ChAdOx1 nCoV-19 vaccine (AZD1222)  
211 against SARS-CoV-2: an interim analysis of four randomised controlled trials in Brazil,  
212 South Africa, and the UK. *Lancet* **397**, 99-111, (2021).
- 213 8 Baum, A. *et al.* REGN-COV2 antibodies prevent and treat SARS-CoV-2 infection in  
214 rhesus macaques and hamsters. *Science* **370**, 1110-1115, (2020).
- 215 9 Shi, R. *et al.* A human neutralizing antibody targets the receptor-binding site of SARS-  
216 CoV-2. *Nature* **584**, 120-124, (2020).
- 217 10 Zhou, P. *et al.* A pneumonia outbreak associated with a new coronavirus of probable  
218 bat origin. *Nature* **579**, 270-273, (2020).
- 219 11 Li, Y. *et al.* SARS-CoV-2 and Three Related Coronaviruses Utilize Multiple ACE2  
220 Orthologs and Are Potently Blocked by an Improved ACE2-Ig. *J Virol* **94**, (2020).
- 221 12 Shi, J. *et al.* Susceptibility of ferrets, cats, dogs, and other domesticated animals to  
222 SARS-coronavirus 2. *Science* **368**, 1016-1020, (2020).

- 223 13 Cui, J., Li, F. & Shi, Z. L. Origin and evolution of pathogenic coronaviruses. *Nat Rev*  
224 *Microbiol* **17**, 181-192, (2019).
- 225 14 Wang, J. *et al.* Mouse-adapted SARS-CoV-2 replicates efficiently in the upper and  
226 lower respiratory tract of BALB/c and C57BL/6J mice. *Protein Cell* **11**, 776-782,  
227 (2020).
- 228 15 Dinno, K. H., 3rd *et al.* A mouse-adapted model of SARS-CoV-2 to test COVID-19  
229 countermeasures. *Nature* **586**, 560-566, (2020).
- 230 16 Gu, H. *et al.* Adaptation of SARS-CoV-2 in BALB/c mice for testing vaccine efficacy.  
231 *Science* **369**, 1603-1607, (2020).
- 232 17 Li, Y. *et al.* Single amino-acid change in mouse Ace2 or viral spike enables SARS-  
233 CoV-2 to utilize mouse Ace2. (2021. manuscript submitted).
- 234 18 Kaushal, N. *et al.* Mutational Frequencies of SARS-CoV-2 Genome during the  
235 Beginning Months of the Outbreak in USA. *Pathogens* **9**, (2020).
- 236 19 Gribble, J. *et al.* The coronavirus proofreading exoribonuclease mediates extensive  
237 viral recombination. *PLoS Pathog* **17**, e1009226, (2021).
- 238 20 Thomson, E. C. *et al.* The circulating SARS-CoV-2 spike variant N439K maintains  
239 fitness while evading antibody-mediated immunity. *bioRxiv*, (2020).
- 240 21 Davies, N. G. *et al.* Estimated transmissibility and severity of novel SARS-CoV-2  
241 Variant of Concern 202012/01 in England. *medRxiv*, (2020).
- 242 22 Laydon, D. J. *et al.* Transmission of SARS-CoV-2 Lineage B.1.1.7 in England: Insights  
243 from linking epidemiological and genetic data. *MedRxiv*, (2020).
- 244 23 Tegally, H. *et al.* Emergence and rapid spread of a new severe acute respiratory  
245 syndrome-related coronavirus 2 (SARS-CoV-2) lineage with multiple spike mutations  
246 in South Africa. *medRxiv*, (2020).

- 247 24 Diseases, J. N. I. o. I. Brief report: New Variant Strain of SARS-CoV-2 Identified in  
248 Travelers from Brazil. doi:[https://www.niid.go.jp/niid/images/epi/corona/covid19-33-](https://www.niid.go.jp/niid/images/epi/corona/covid19-33-en-210112)  
249 [en-210112](https://www.niid.go.jp/niid/images/epi/corona/covid19-33-en-210112), (2021).
- 250 25 Oude Munnink, B. B. *et al.* Transmission of SARS-CoV-2 on mink farms between  
251 humans and mink and back to humans. *Science* **371**, 172-177, (2021).
- 252 26 Welkers, M. R. A., Han, A. X., Reusken, C. B. E. M. & Eggink, D. Possible host-  
253 adaptation of SARS-CoV-2 due to improved ACE2 receptor binding in mink. *Virus*  
254 *evolution*, (2020).
- 255 27 Elasad, A., Fawzy, M., Basiouni, S. & Shehata, A. A. Mutational spectra of SARS-  
256 CoV-2 isolated from animals. *PeerJ* **8**, e10609, (2020).
- 257 28 Kemp, S. A. *et al.* Neutralising antibodies drive Spike mediated SARS-CoV-2 evasion.  
258 *MedRxiv*, (2020).
- 259 29 Li, Q. *et al.* The Impact of Mutations in SARS-CoV-2 Spike on Viral Infectivity and  
260 Antigenicity. *Cell* **182**, 1284-1294 e1289, (2020).
- 261 30 Wu, K. *et al.* mRNA-1273 vaccine induces neutralizing antibodies against spike  
262 mutants from global SARS-CoV-2 variants. *bioRxiv*, (2021).
- 263 31 Wang, Z. *et al.* mRNA vaccine-elicited antibodies to SARS-CoV-2 and circulating  
264 variants. *bioRxiv*, (2021).
- 265 32 Rees-Spear, C. *et al.* The impact of Spike mutations on SARS-1 CoV-2 neutralization.  
266 *bioRxiv*, (2021).

267

268

## 269 Figures and legends

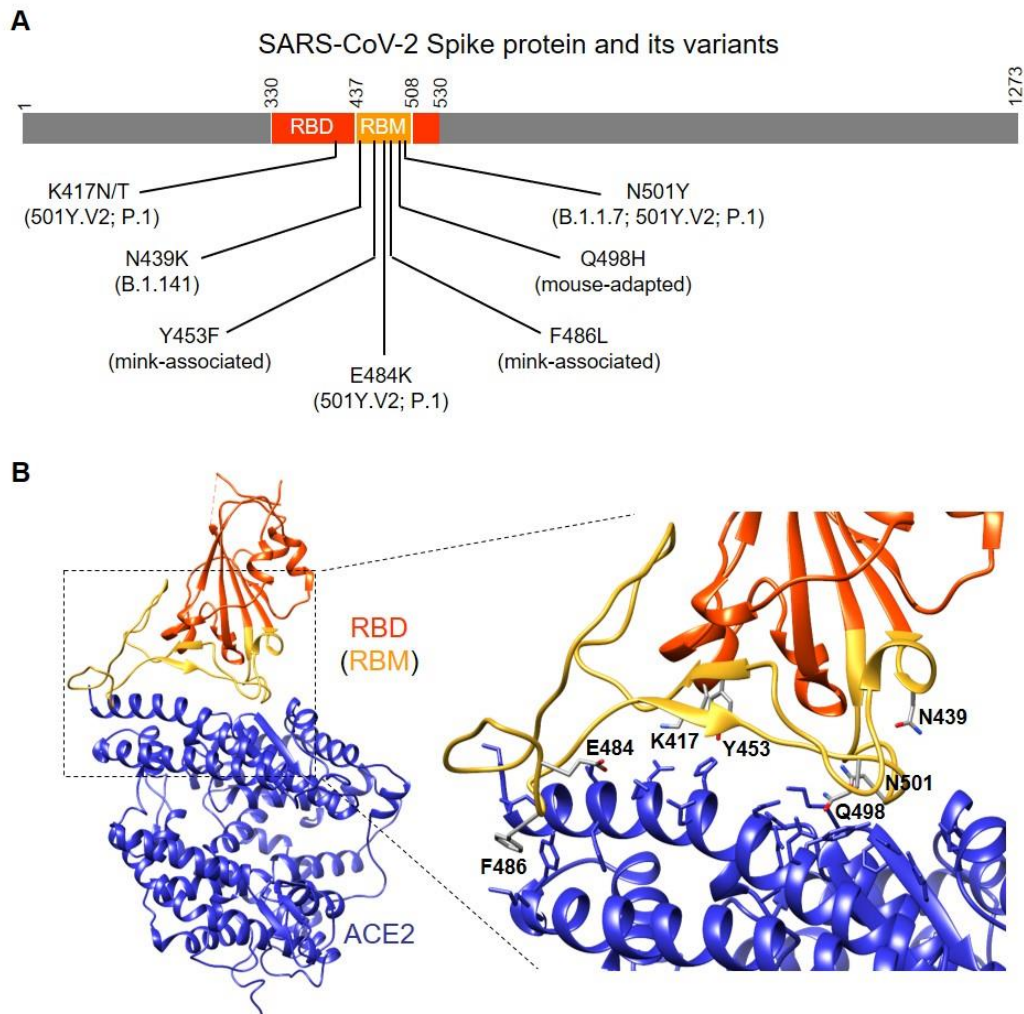

270

271 **Figure 1. SARS-CoV-2 Spike variants.** (A) SARS-CoV-2 Spike amino acid numbers are  
272 indicated. The receptor binding domain (RBD) is in red and the receptor binding motif (RBM)  
273 is in yellow. Spike mutations investigated in this study are indicated, with the associated  
274 SARS-CoV-2 variant number shown in parentheses. (B) Interactions between SARS-CoV-2  
275 RBD (red) and ACE2 (PDB code 6M0J). The ACE2 residues in less than 4 Å from RBD atoms  
276 are shown. SARS-CoV-2 variant-associated RBD mutations that were investigated in  
277 following study are shown and labelled, including residues K417N, N439K, Y453F, E484K,  
278 F486L, Q498H, and N501Y.

279

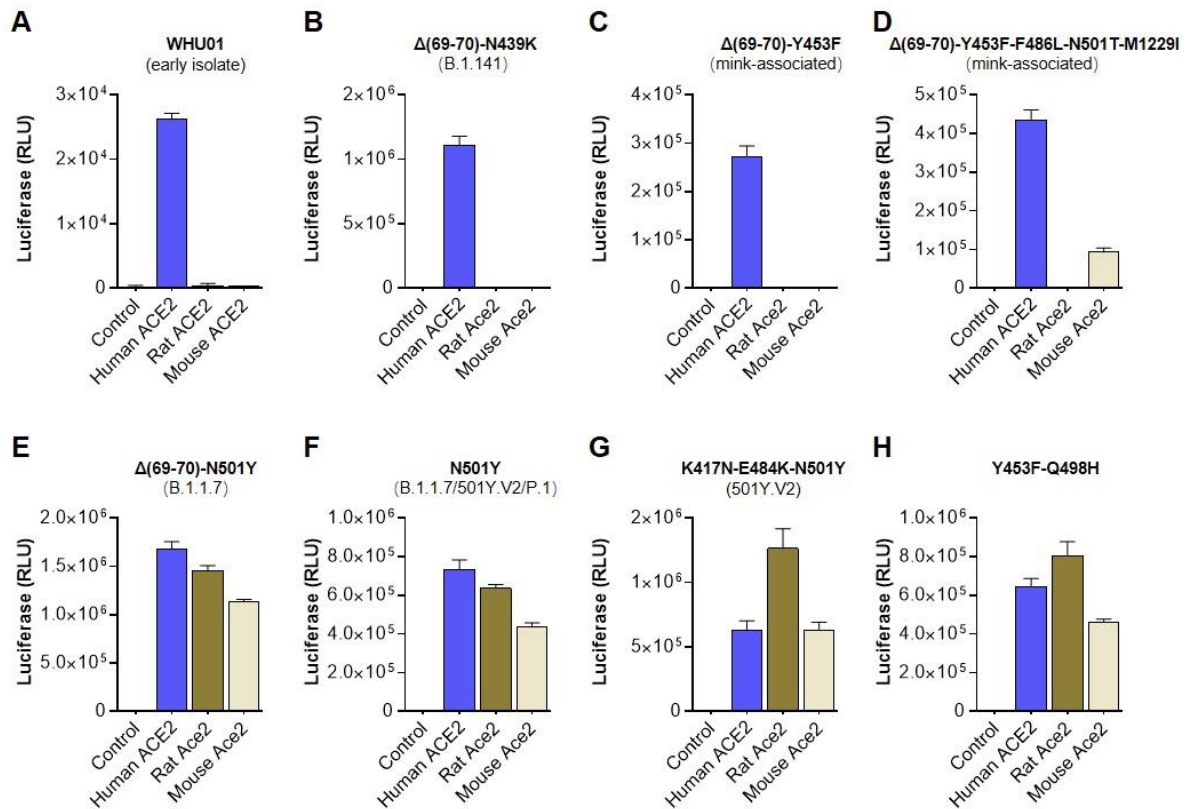

280

281 **Figure 2. Cross-species receptor usage of multiple SARS-CoV-2 variants that emerged**

282 **during the pandemic.** 293T cells in 96-well plates were transfected with 60 ng of a vector

283 control plasmid, or a plasmid expressing an ACE2 ortholog of human, rat, or mouse. Cells

284 were then infected with reporter retroviruses pseudotyped with the indicated SARS-CoV-2

285 Spike variants. ACE2 ortholog-mediated viral entry was measured by luciferase reporter

286 expression at 48 hours post infection. Data shown are representative of two or three

287 experiments independently performed by two different people with similar results, and data

288 points represent mean ± s.d. of three biological replicates.

289



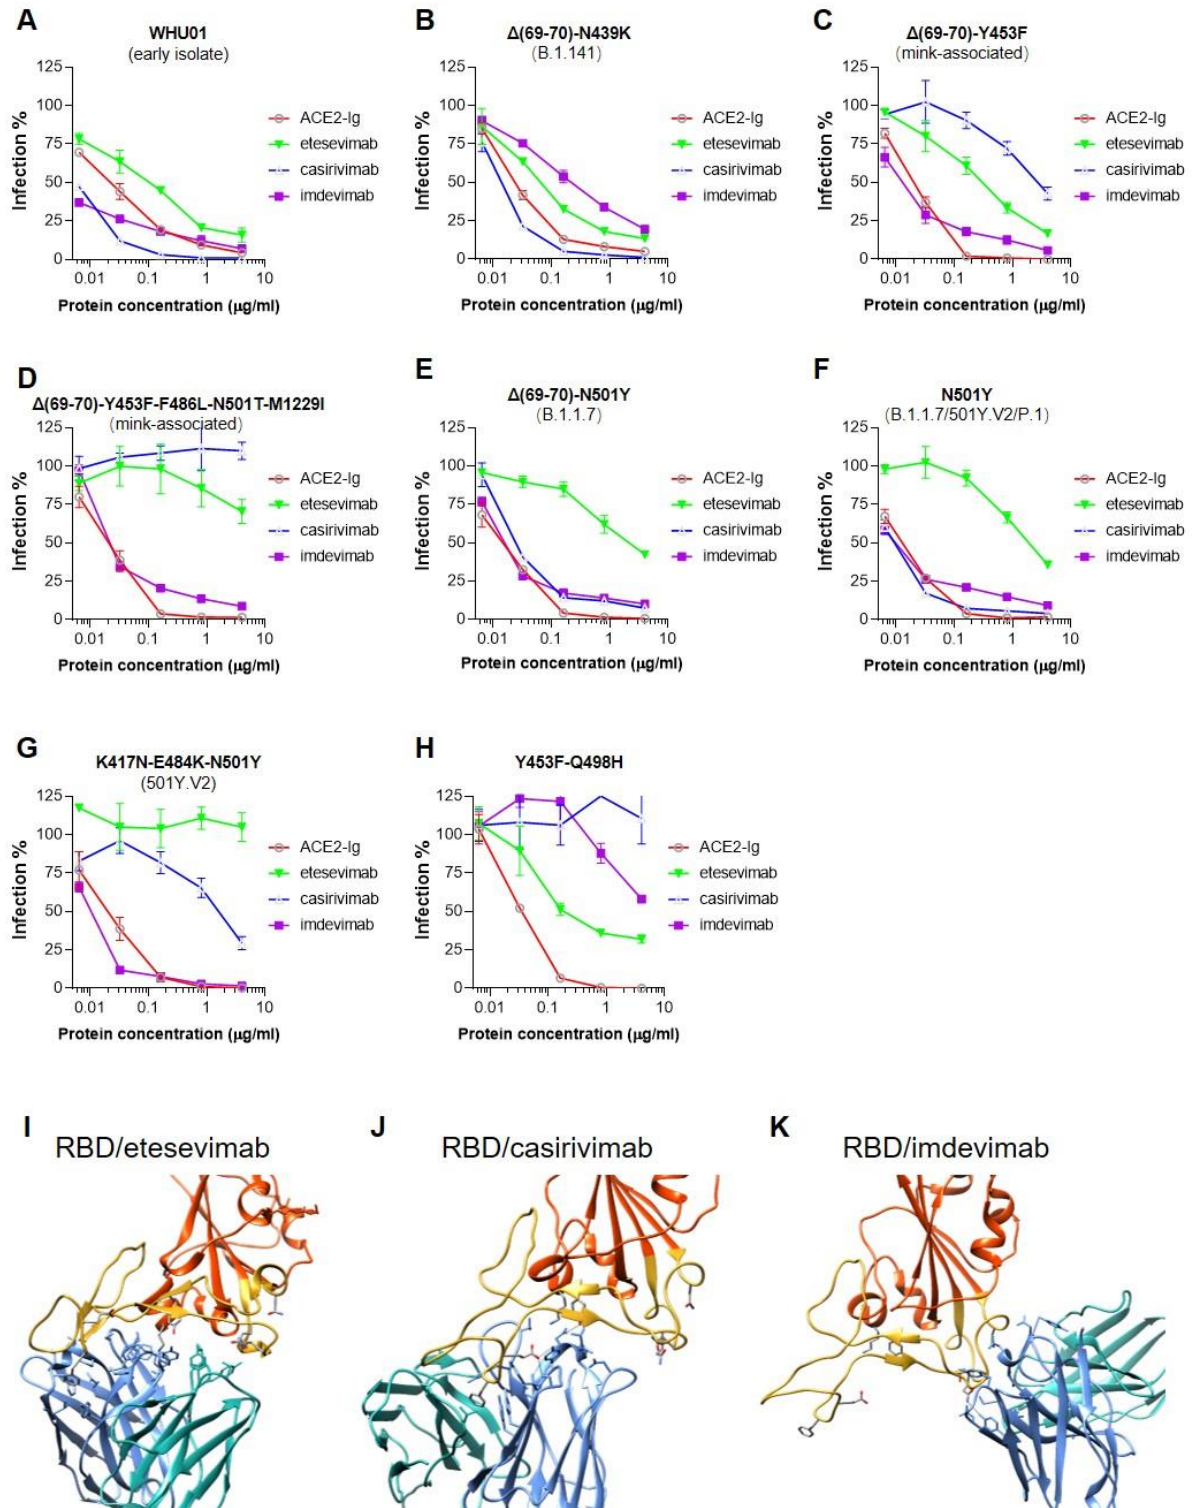

290

291 **Figure 3. Sensitivity of SARS-CoV-2 variants to neutralizing antibodies and ACE2-Ig.**

292 (A-H) HeLa-hACE2 cells in 96-well plates were infected with SARS-CoV-2 Spike variant-

293 pseudotyped retroviruses in the presence of an ACE2-Ig variant we developed recently or a

294 clinical-stage anti-SARS-CoV-2 antibody (etesevimab, casirivimab, or imdevimab) at the

295 indicated concentrations. Etesevimab was originally named as CB6<sup>ref.9</sup>, casirivimab as  
 296 REGN10933<sup>ref.8</sup>, and imdevimab as REGN10987<sup>ref.8</sup>. Viral entry was measured by luciferase  
 297 reporter expression at 48 hours post infection. Luminescence values observed at each  
 298 concentration were divided by the values observed at concentration zero to calculate  
 299 percentage-of-infection (Infection%) values. Data shown are representative of two  
 300 experiments independently performed by two different people with similar results, and data  
 301 points represent mean  $\pm$  s.d. of three biological replicates. Estimated IC50 and IC90 values for  
 302 each protein are summarized in Table 1. **(I-K)** Interactions between SARS-CoV-2 RBD and  
 303 monoclonal antibody etesevimab (**I**; PDB code 7C01), casirivimab (**J**; PDB code 6XDG), and  
 304 imdevimab (**K**; PDB code 6XDG). The RBD is shown in red and yellow, and antibodies are  
 305 shown in blue and green. The antibody residues in less than 4 Å from RBD atoms and SARS-  
 306 CoV-2 variant-associated RBD mutations are shown. SARS-CoV-2 variant-associated RBD  
 307 mutations that were investigated in this study are shown, including residues K417N, N439K,  
 308 Y453F, E484K, F486L, Q498H, and N501Y, as shown in Figure 1B.

309

310 **Table 1. IC50 (in parentheses) and IC90 values of the tested proteins (µg/mL)**

|             | WHU01              | $\Delta(69-70)$ -<br>N439K | $\Delta(69-70)$ -<br>Y453F | $\Delta(69-70)$ -<br>Y453F-F486L-<br>N501T-M1229I | $\Delta(69-70)$ -<br>N501Y | N501Y           | K417N-<br>E484K-<br>N501Y | Y453F-<br>Q498H |
|-------------|--------------------|----------------------------|----------------------------|---------------------------------------------------|----------------------------|-----------------|---------------------------|-----------------|
| etesevimab  | >4.0<br>(0.1)      | >4.0<br>(0.065)            | >4.0<br>(0.3)              | >>4.0<br>(>4.0)                                   | >4.0<br>(2.2)              | >4.0<br>(2.0)   | n.r.                      | >4.0<br>(0.18)  |
| casirivimab | 0.045<br>(<0.0064) | 0.1<br>(0.015)             | >4.0<br>(1.6)              | n.r.                                              | 1.5<br>(0.25)              | 0.11<br>(0.009) | >4.0<br>(1.7)             | n.r.            |
| imdevimab   | 1.5<br>(<0.0064)   | >4.0<br>(0.22)             | 1.5<br>(0.015)             | 2.5<br>(0.02)                                     | 3.5<br>(0.16)              | 3<br>(0.1)      | 0.06<br>(0.01)            | >>4.0<br>(>4.0) |
| ACE2-Ig     | 0.7<br>(0.022)     | 0.45<br>(0.025)            | 0.12<br>(0.02)             | 0.12<br>(0.02)                                    | 0.12<br>(0.015)            | 0.11<br>(0.013) | 0.15<br>(0.02)            | 0.15<br>(0.035) |

311

312

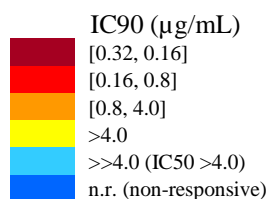

313



## 314 **Materials and methods**

### 315 **Cells**

316 293T and HeLa cells were kindly provided by Stem Cell Bank, Chinese Academy of Sciences,  
317 confirmed mycoplasma-free by the provider, and maintained in Dulbecco's Modified Eagle  
318 Medium (DMEM, Life Technologies) at 37 °C in a 5% CO<sub>2</sub>-humidified incubator. Growth  
319 medium was supplemented with 2 mM Glutamax-I (Gibco, Cat. No. 35050061), 100 μM non-  
320 essential amino acids (Gibco, Cat. No. 11140050), 100 U/mL penicillin and 100 μg/mL  
321 streptomycin (Gibco, Cat. No. 15140122), and 10% FBS (Gibco, Cat. No. 10099141C). HeLa-  
322 based stable cells expressing human ACE2 (HeLa-hACE2) were maintained under the same  
323 culture condition as HeLa, except that 3 μg/mL of puromycin was added to the growth medium.  
324 293F cells for the production of ACE2-Ig protein and SARS-CoV-2 antibodies were  
325 generously provided by Dr. Yu J. Cao (School of Chemical Biology and Biotechnology, Peking  
326 University Shenzhen Graduate School) and maintained in SMM 293-TII serum-free medium  
327 (Sino Biological, Cat. No. M293TII) at 37 °C, 8% CO<sub>2</sub>, in a shaker incubator at 125 rpm.

### 328 **Plasmids**

329 DNA fragments encoding Spike proteins of SARS-CoV-2 WHU01 (GenBank: MN988668.1)  
330 was synthesized by the Beijing Genomic Institute (BGI, China) and then cloned into  
331 pcDNA3.1(+) plasmid between EcoRI and XhoI restriction sites. Plasmids encoding SARS-  
332 CoV-2 Spike variants were generated according the in-fusion cloning protocol. To facilitate  
333 SARS-CoV-2 pseudovirus production, Spike sequences for WHU01 and all the variants  
334 investigated in this study all contain a furin-cleavage site mutation ( $\Delta$ PRRA). We had shown  
335 in our previous study that the  $\Delta$ PRRA mutation does not affect SARS-CoV-2 cross-species  
336 receptor usage or neutralization sensitivity<sup>11</sup>. Plasmids encoding the ACE2-Ig variant were  
337 generated in our previous study<sup>11</sup>. DNA fragments encoding heavy and light chains of SARS-

338 CoV-2 antibodies (etesevimab, casirivimab, and imdevimab) were synthesized by Sangon  
339 Biotech (Shanghai, China) and then cloned into a pCAGGS plasmid. The retroviral reporter  
340 plasmids encoding a Gaussia luciferase reporter gene were constructed by cloning the reporter  
341 genes into the pQCXIP plasmid (Clontech). DNA fragments encoding C-terminally S-tagged  
342 ACE2 orthologs were synthesized in pUC57 backbone plasmid by Sangon Biotech (Shanghai,  
343 China). These fragments were then cloned into pQCXIP plasmid (Clontech) between SbfI and  
344 NotI restriction sites.

### 345 **Production and Purification of ACE2-Ig protein and SARS-CoV-2 antibodies**

346 293F cells at the density of  $6 \times 10^5$  cells/mL were seeded into 100 mL SMM 293-TII serum-  
347 free medium (Sino Biological, Cat. No. M293TII) one day before transfection. Cells were then  
348 transfected with 100  $\mu$ g plasmid in complex with 250  $\mu$ g PEI MAX 4000 (Polysciences, Inc,  
349 Cat. No. 24765-1). Cell culture supernatants were collected at 48 to 72 hours post transfection.  
350 Human IgG1 Fc-containing proteins were purified using Protein A Sepharose CL-4B (GE  
351 Healthcare, Cat. No. 17-0780-01), eluted with 0.1 M citric acid at pH 4.5 and neutralized with  
352 1 M Tris-HCl at pH 9.0. Buffers were then exchanged to PBS and proteins were concentrated  
353 by 30 kDa cut-off Amicon Ultra-15 Centrifugal Filter Units (Millipore, Cat. No. UFC903096).

### 354 **Production of reporter retroviruses pseudotyped with SARS-CoV-2 Spike variants**

355 MLV retroviral vector-based SARS-CoV-2 Spike pseudotypes were produced according to our  
356 previous study<sup>11</sup>, with minor changes. In brief, 293T cells were seeded at 30% density in 150  
357 mm dish at 12-15 hours before transfection. Cells were then transfected with 67.5  $\mu$ g of  
358 polyethylenimine (PEI) Max 40,000 (Polysciences, Inc, Cat. No. 24765-1) in complex with  
359 3.15  $\mu$ g of plasmid encoding a Spike variant, 15.75  $\mu$ g of plasmid encoding murine leukemia  
360 virus (MLV) Gag and Pol proteins, and 15.75  $\mu$ g of a pQCXIP-based luciferase reporter  
361 plasmid. Eight hours after transfection, cell culture medium was refreshed and changed to

362 growth medium containing 2% FBS (Gibco, Cat. No. 10099141C) and 25 mM HEPES (Gibco,  
363 Cat. No. 15630080). Cell culture supernatants were collected at 36-48 hours post transfection,  
364 spun down at 3000×g for 10 min, and filtered through 0.45 µm filter units to remove cell debris.  
365 SARS-CoV-2 Spike-pseudotyped viruses were then concentrated 10 times at 2000×g using 100  
366 kDa cut-off Amicon Ultra-15 Centrifugal Filter Units (Millipore. Cat. No. UFC910024).

### 367 **SARS-CoV-2 pseudovirus infection of 293T cells expressing ACE2 orthologs**

368 Pseudovirus infection assay was performed according to our previous study<sup>11</sup>. In brief, 293T  
369 cells were seeded at 20% density in poly-lysine pre-coated 96-well plates 12-15 hours before  
370 transfection. Cells in each well were then transfected with 0.2 µL of lipofectamine 2000 (Life  
371 Technologies, Cat. No. 11668019) in complex with 60 ng of a vector control plasmid or a  
372 plasmid encoding an ACE2 ortholog. Cell culture medium was refreshed at 12 hours post  
373 transfection. Additional 18 hours later, cells in each well were infected with 10 µL of SARS-  
374 CoV-2 pseudovirus (10×concentrated) diluted in 100 µL of culture medium containing 2%  
375 FBS (Gibco, Cat. No. 10099141C). Culture medium was refreshed at 2 hours post pseudovirus  
376 infection and the medium was refreshed every 12 hours. Cell culture supernatants were  
377 collected and subjected to a Gaussia luciferase assay at 48 hours post infection.

### 378 **Gaussia luciferase luminescence flash assay**

379 To measure Gaussia luciferase expression, 20 µL of cell culture supernatant of each sample  
380 and 100 µL of assay buffer containing 4 µM coelenterazine native (Biosynth Carbosynth, Cat.  
381 No. C-7001) were added to one well of a 96-well black opaque assay plate (Corning, Cat. No.  
382 3915), and measured with Centro LB 960 microplate luminometer (Berthold Technologies) for  
383 0.1 second/well.

### 384 **SARS-CoV-2 pseudovirus neutralization assay**

385 Pseudovirus neutralization experiments were performed following our previous study<sup>11</sup>. In  
386 brief, SARS-CoV-2 Spike variant-pseudotyped luciferase reporter viruses were pre-diluted in  
387 DMEM (2% FBS, heat-inactivated) containing titrated amounts of the ACE2-Ig or one of the  
388 three anti-SARS-CoV-2 antibodies. Virus-inhibitor mixtures were incubated at 37 °C for  
389 30min, then added to HeLa-hACE2 cells in 96-well plates and incubated overnight at 37 °C.  
390 Virus-inhibitor-containing supernatant was then removed and changed with 150 µL of fresh  
391 DMEM (2% FBS) and incubated at 37 °C. Cell culture supernatants were collected for Gaussia  
392 luciferase assay at 48 h post infection.

### 393 **Data collection and analysis**

394 All the experiments were repeated at least twice with two different people. GraphPad Prism  
395 6.0 software was used for figure preparation and statistical analyses.

### 396 **Statistical analysis**

397 Data expressed as mean values ± s.d. Statistical analyses were performed using two-sided two-  
398 sample Student's t-test using GraphPad Prism 6.0 software when applicable. Differences were  
399 considered significant at  $P < 0.01$ .

### 400 **Data availability**

401 The study did not generate unique datasets or code. Our research resources, including methods,  
402 plasmids, and protocols, are available upon reasonable request to qualified academic  
403 investigators for noncommercial research purposes. All reagents developed in this study, such  
404 as vector plasmids, as well as detailed methods, will be made available upon written request.
